# Supplementary material for: Long-term follow up of human T-cell responses to conserved HIV-1 regions elicited by DNA/simian adenovirus/MVA vaccine regimens
Source: PubMed Central journal article supplement (PMC5515449; doi:10.1371/journal.pone.0181382), 2017-07-18
Supplement: pone.0181382.s001.pdf [file pone.0181382.s001.pdf]

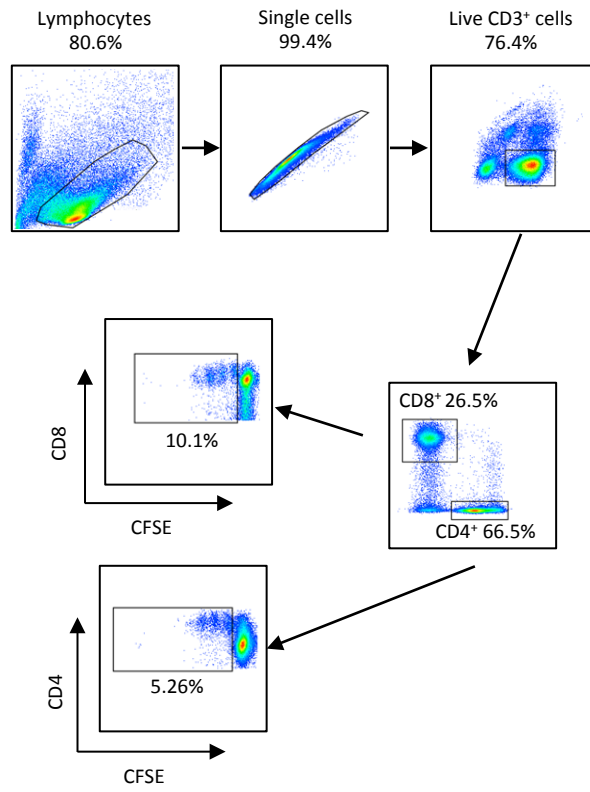

S1 Fig. Gating strategy for T-cell proliferation assay by CFSE dilution.
