# Supplementary material for: Long-term follow up of human T-cell responses to conserved HIV-1 regions elicited by DNA/simian adenovirus/MVA vaccine regimens
Source: PubMed Central journal article supplement (PMC5515449; doi:10.1371/journal.pone.0181382), 2017-07-18
Supplement: pone.0181382.s002.pdf [file pone.0181382.s002.pdf]

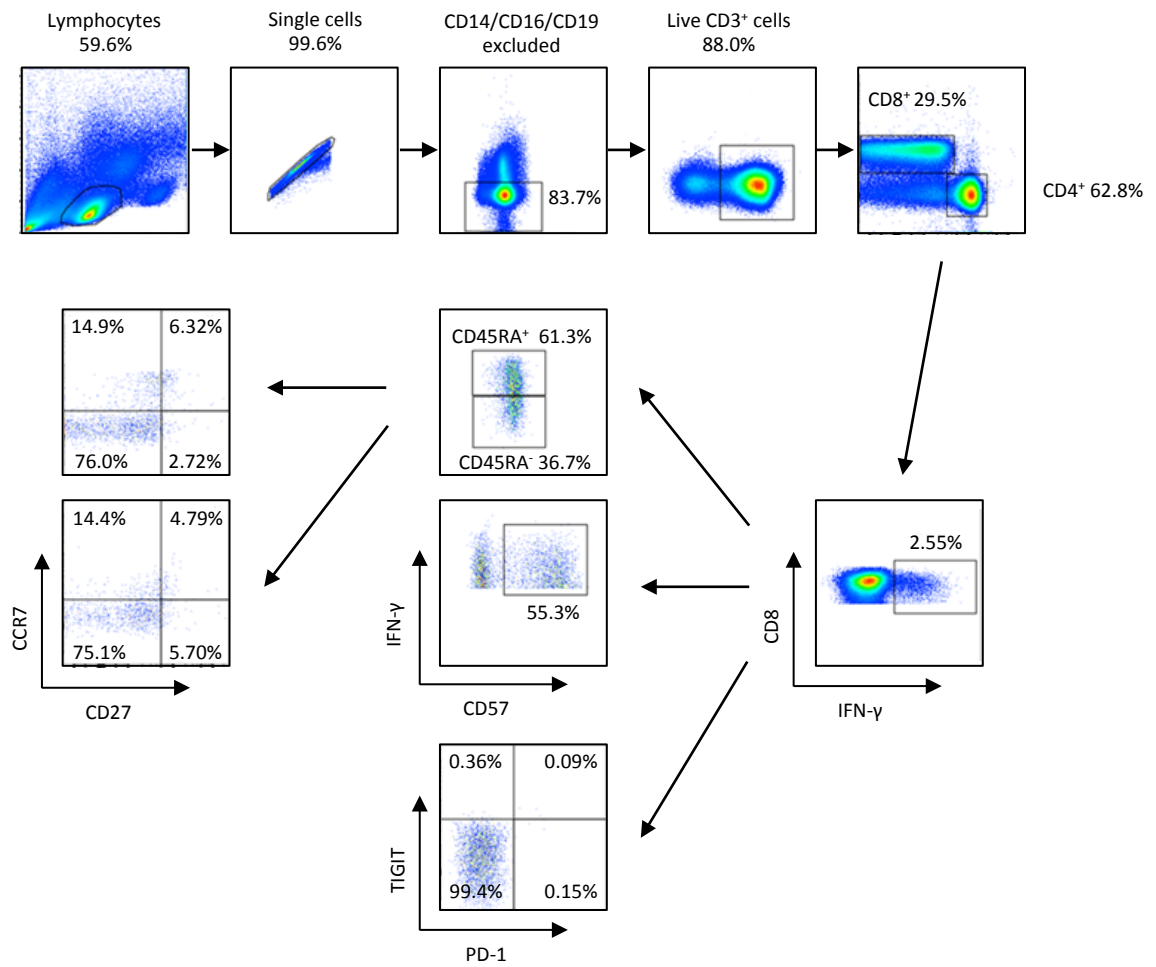

S2 Fig. Gating strategy for detection of HIVconsv-specific memory T-cell subsets using IFN- $\gamma$  capture assay in PBMCs of HLA-A\*02:01-positive vaccine recipients.
