# Supplementary material for: Long-term follow up of human T-cell responses to conserved HIV-1 regions elicited by DNA/simian adenovirus/MVA vaccine regimens
Source: PubMed Central journal article supplement (PMC5515449; doi:10.1371/journal.pone.0181382), 2017-07-18
Supplement: pone.0181382.s003.pdf [file pone.0181382.s003.pdf]

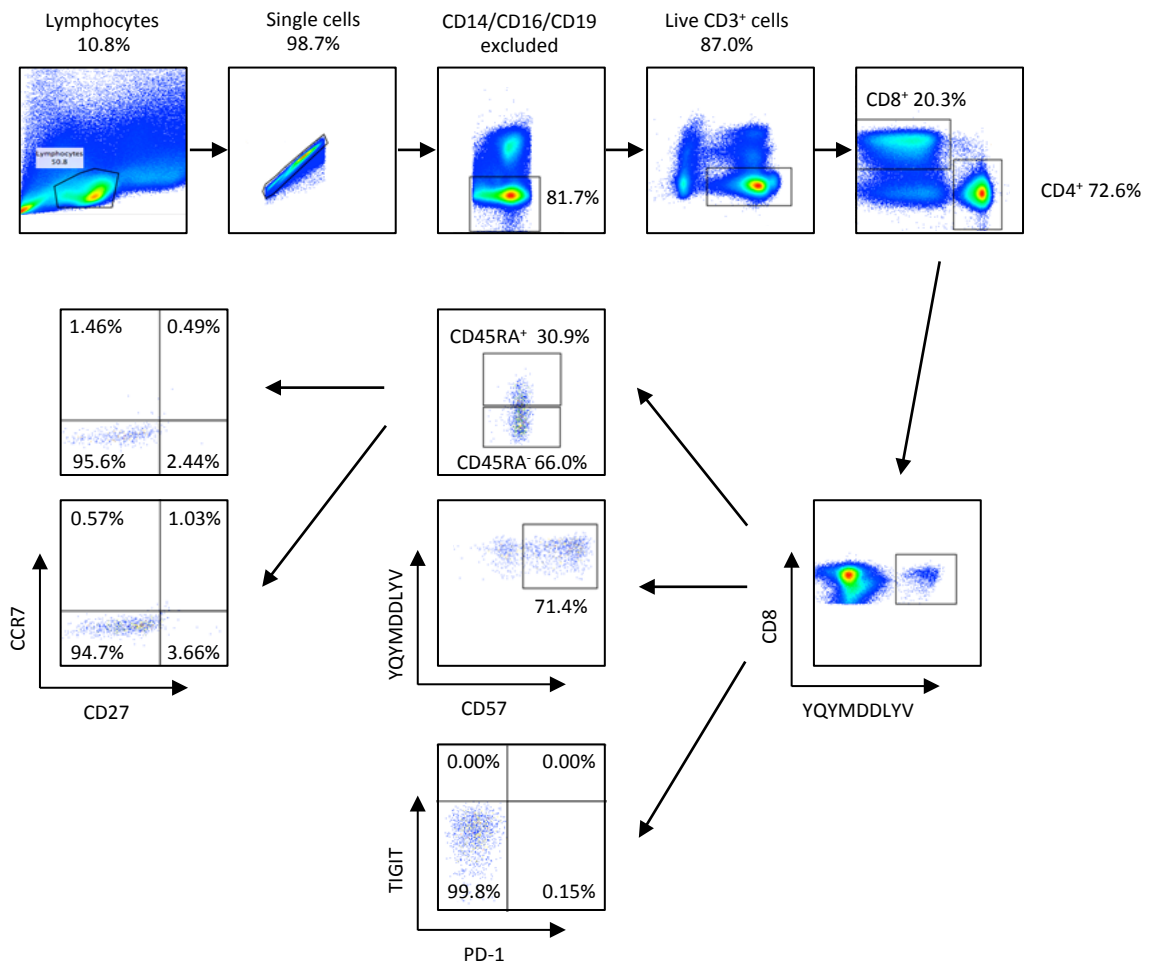

S3 Fig. Gating strategy for detection of memory CD8<sup>+</sup> T-cell subsets within dextramer-reactive PBMCs.
