# Supplementary material for: Long-term follow up of human T-cell responses to conserved HIV-1 regions elicited by DNA/simian adenovirus/MVA vaccine regimens
Source: PubMed Central journal article supplement (PMC5515449; doi:10.1371/journal.pone.0181382), 2017-07-18
Supplement: pone.0181382.s004.pdf [file pone.0181382.s004.pdf]

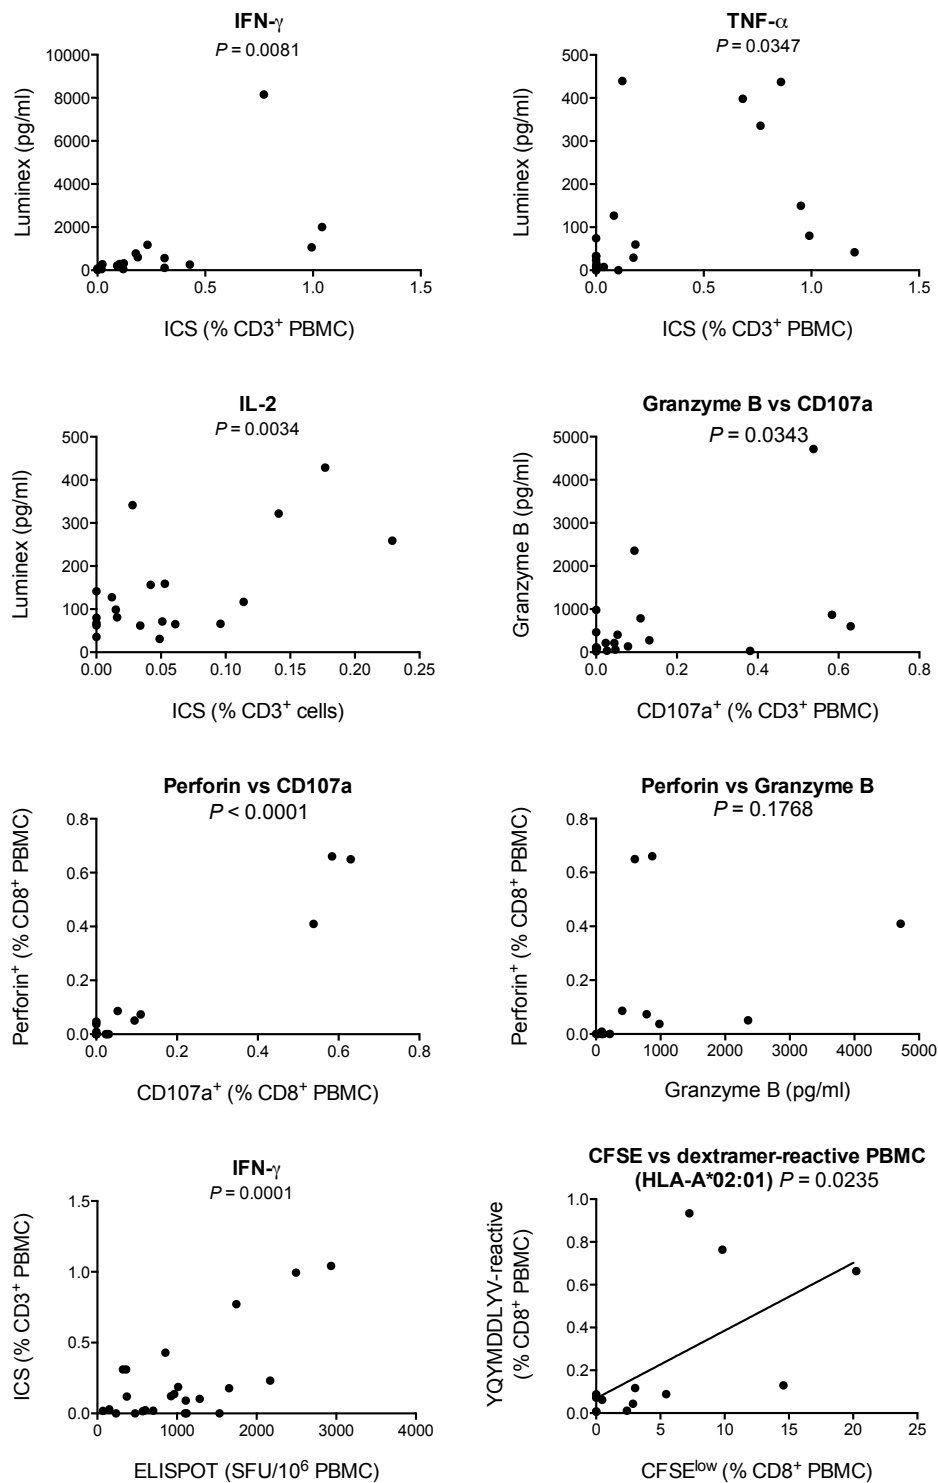

S4 Fig. Correlations between Luminex, ICS, ELISPOT and CFSE proliferation assays. Volunteers' PBMCs were restimulated using personalized 15-mer peptide pools in either Luminex, ICS, ELISPOT or CFSE proliferation assays as described in Materials and Methods. Correlation significance was determined using the Prism 6 software and  $P$  values (two-tailed) are given in the title of each graph.
